# Supplementary material for: Comparative Genomic Analysis of Two Serotype 1/2b Listeria monocytogenes Isolates from Analogous Environmental Niches Demonstrates the Influence of Hypervariable Hotspots in Defining Pathogenesis
Source: PubMed Central journal article supplement (PMC5174086; doi:10.3389/fnut.2016.00054), 2016-12-21
Supplement: table_1.pdf [file table_1.pdf]

**Table S1:** Locations of hypervariable hotspots within each of the input strains.

| <b>Hotspot</b> | <b>DPC6895 locus tag range</b>       | <b>FSL J2-064 locus tag range</b>     |
|----------------|--------------------------------------|---------------------------------------|
| 1              | TZ05_0070 - TZ05_0084 ( <b>13</b> )  | M637_02925 - M637_02975 ( <b>9</b> )  |
| 2              | TZ05_0146 - TZ05_0153c ( <b>6</b> )  | M637_03290 - M637_03345 ( <b>10</b> ) |
| 3              | TZ05_0302 - TZ05_0305 ( <b>2</b> )   | M637_04100 - M637_04115 ( <b>2</b> )  |
| 4              | TZ05_0310c - TZ05_0323 ( <b>12</b> ) | M637_04140 - M637_04205 ( <b>12</b> ) |
| 5              | TZ05_0384 - TZ05_0388c ( <b>3</b> )  | M637_04530 - M637_04560 ( <b>5</b> )  |
| 6              | TZ05_0449 - TZ05_0452c ( <b>2</b> )  | M637_04845 - M637_04865 ( <b>3</b> )  |
| 7              | TZ05_0471 - TZ05_0478 ( <b>6</b> )   | M637_04985 - M637_05045 ( <b>11</b> ) |
| 8              | TZ05_1096 - TZ05_1109 ( <b>12</b> )  | M637_08150 - M637_08240 ( <b>17</b> ) |
| 9              | TZ05_2013 - TZ05_2029c ( <b>15</b> ) | M637_13210 - M637_13265 ( <b>10</b> ) |
