# Supplementary material for: Comparative Genomic Analysis of Two Serotype 1/2b Listeria monocytogenes Isolates from Analogous Environmental Niches Demonstrates the Influence of Hypervariable Hotspots in Defining Pathogenesis
Source: PubMed Central journal article supplement (PMC5174086; doi:10.3389/fnut.2016.00054), 2016-12-21
Supplement: table_2.pdf [file table_2.pdf]

**Table S2:** Strain-specific genes in *L. monocytogenes* strain DPC6895 when compared to strain FSL J2-064.

| Start  | End    | Contig | F/R | Length (AA) | Locus Tag         | Function                                                                        |
|--------|--------|--------|-----|-------------|-------------------|---------------------------------------------------------------------------------|
| 77994  | 78378  | 1      | F   | 144         | <i>TZ05_0076</i>  | Hypothetical Protein                                                            |
| 78796  | 79512  | 1      | F   | 238         | <i>TZ05_0077</i>  | Hypothetical Protein                                                            |
| 79513  | 79836  | 1      | F   | 107         | <i>TZ05_0078</i>  | Hypothetical Protein                                                            |
| 80003  | 80296  | 1      | F   | 97          | <i>TZ05_0079</i>  | Hypothetical Protein                                                            |
| 80433  | 81155  | 1      | F   | 240         | <i>TZ05_0080</i>  | Membrane Protein                                                                |
| 81395  | 81577  | 1      | F   | 60          | <i>TZ05_0081</i>  | Hypothetical Protein                                                            |
| 82262  | 82546  | 1      | F   | 94          | <i>TZ05_0082</i>  | Hypothetical Protein                                                            |
| 82555  | 82983  | 1      | F   | 142         | <i>TZ05_0083</i>  | Hypothetical Protein                                                            |
| 88623  | 89021  | 1      | F   | 132         | <i>TZ05_0089</i>  | Hypothetical Protein                                                            |
| 89197  | 89799  | 1      | F   | 200         | <i>TZ05_0090</i>  | Hypothetical Protein                                                            |
| 165210 | 165809 | 2      | F   | 199         | <i>TZ05_0385</i>  | Hypothetical Protein                                                            |
| 165806 | 167164 | 2      | F   | 452         | <i>TZ05_0386</i>  | Retron-type RNA-directed DNA polymerase                                         |
| 167207 | 167323 | 2      | F   | 38          | <i>TZ05_0387</i>  | Hypothetical Protein                                                            |
| 198138 | 196027 | 2      | R   | 703         | <i>TZ05_0420c</i> | Lead/cadmium/zinc and mercury transporting ATPase                               |
| 198499 | 198131 | 2      | R   | 122         | <i>TZ05_0421c</i> | Cadmium efflux system accessory protein / ArsR family transcriptional regulator |
| 199129 | 198536 | 2      | R   | 197         | <i>TZ05_0422c</i> | SAM-dependent methyltransferase                                                 |
| 199636 | 200190 | 2      | F   | 187         | <i>TZ05_0423</i>  | Resolvase / integrase Bin                                                       |
| 200204 | 201658 | 2      | F   | 484         | <i>TZ05_0424</i>  | Tn552 transposase                                                               |
| 201651 | 202463 | 2      | F   | 270         | <i>TZ05_0425</i>  | ATP-binding protein p271                                                        |
| 240321 | 239773 | 2      | R   | 182         | <i>TZ05_0461c</i> | Stress Survival Islet gene F2365 homolog                                        |
| 2002   | 2184   | 3      | F   | 60          | <i>TZ05_0475</i>  | Hypothetical Protein                                                            |
| 2306   | 3133   | 3      | F   | 275         | <i>TZ05_0476</i>  | Hypothetical Protein                                                            |
| 3161   | 3520   | 3      | F   | 119         | <i>TZ05_0477</i>  | Putative Secreted Protein                                                       |
| 10368  | 10745  | 3      | F   | 125         | <i>TZ05_0486</i>  | Hypothetical Protein                                                            |
| 42503  | 43325  | 3      | F   | 240         | <i>TZ05_0520</i>  | CRISPR repeat RNA endoribonuclease Cas6                                         |

| <b>Start</b> | <b>End</b> | <b>Contig</b> | <b>F/R</b> | <b>Length (AA)</b> | <b>Locus Tag</b>  | <b>Function</b>                                                             |
|--------------|------------|---------------|------------|--------------------|-------------------|-----------------------------------------------------------------------------|
| 43241        | 44929      | 3             | F          | 562                | <i>TZ05_0521</i>  | CRISPR-associated protein Cst1                                              |
| 44919        | 45788      | 3             | F          | 289                | <i>TZ05_0522</i>  | CRISPR-associated negative autoregulator                                    |
| 45766        | 46548      | 3             | F          | 260                | <i>TZ05_0523</i>  | CRISPR-associated protein Cas5                                              |
| 46616        | 48805      | 3             | F          | 729                | <i>TZ05_0524</i>  | CRISPR-associated helicase Cas3                                             |
| 48861        | 49103      | 3             | F          | 80                 | <i>TZ05_0525</i>  | CRISPR-associated protein Cas1 maturase                                     |
| 49066        | 49386      | 3             | F          | 106                | <i>TZ05_0526</i>  | CRISPR-associated protein Cas2                                              |
| 282358       | 282810     | 4             | F          | 150                | <i>TZ05_0816</i>  | Transcriptional regulator, MarR family                                      |
| 282826       | 283332     | 4             | F          | 168                | <i>TZ05_0817</i>  | GNAT family acetyltransferase                                               |
| 565862       | 566539     | 4             | F          | 225                | <i>TZ05_1097</i>  | Hypothetical Protein                                                        |
| 566524       | 567237     | 4             | F          | 237                | <i>TZ05_1098</i>  | Hypothetical Protein                                                        |
| 567350       | 568159     | 4             | F          | 269                | <i>TZ05_1099</i>  | Hypothetical Protein                                                        |
| 569250       | 569618     | 4             | F          | 122                | <i>TZ05_1103</i>  | Hypothetical Protein                                                        |
| 1055357      | 1054485    | 4             | R          | 290                | <i>TZ05_1587c</i> | Hypothetical Protein                                                        |
| 10191        | 8575       | 5             | R          | 538                | <i>TZ05_1682c</i> | Site-specific recombinase                                                   |
| 10425        | 10249      | 5             | R          | 58                 | <i>TZ05_1683c</i> | Hypothetical Protein                                                        |
| 10891        | 10631      | 5             | R          | 86                 | <i>TZ05_1684c</i> | Hypothetical Protein                                                        |
| 11434        | 11171      | 5             | R          | 87                 | <i>TZ05_1685c</i> | Hypothetical Protein                                                        |
| 11539        | 11754      | 5             | F          | 71                 | <i>TZ05_1686</i>  | Transcriptional Regulator                                                   |
| 11958        | 13352      | 5             | F          | 464                | <i>TZ05_1687</i>  | RLX protein                                                                 |
| 14263        | 13655      | 5             | R          | 202                | <i>TZ05_1688c</i> | Hypothetical Protein                                                        |
| 15725        | 14265      | 5             | R          | 486                | <i>TZ05_1689c</i> | Hypothetical Protein                                                        |
| 39316        | 38255      | 5             | R          | 353                | <i>TZ05_1716c</i> | Hypothetical Protein                                                        |
| 3426         | 4115       | 7             | F          | 229                | <i>TZ05_2017</i>  | Methyltransferase                                                           |
| 4112         | 5680       | 7             | F          | 522                | <i>TZ05_2018</i>  | Dipeptide-binding ABC transporter, periplasmic substrate-binding component  |
| 5682         | 6620       | 7             | F          | 312                | <i>TZ05_2019</i>  | Dipeptide transport system permease protein DppB                            |
| 6617         | 7399       | 7             | F          | 260                | <i>TZ05_2020</i>  | Dipeptide transport system permease protein DppC                            |
| 7392         | 8099       | 7             | F          | 235                | <i>TZ05_2021</i>  | ABC-type nickel / oligopeptides specific transport system, ATPase component |
| 8092         | 8763       | 7             | F          | 223                | <i>TZ05_2022</i>  | NAD <sup>+</sup> synthetase                                                 |

| <b>Start</b> | <b>End</b> | <b>Contig</b> | <b>F/R</b> | <b>Length (AA)</b> | <b>Locus Tag</b>  | <b>Function</b>                 |
|--------------|------------|---------------|------------|--------------------|-------------------|---------------------------------|
| 9794         | 9444       | 7             | R          | 116                | <i>TZ05_2023c</i> | Hypothetical Protein            |
| 10897        | 10076      | 7             | R          | 273                | <i>TZ05_2024c</i> | Hypothetical Protein            |
| 11150        | 11019      | 7             | R          | 43                 | <i>TZ05_2025c</i> | Hypothetical Protein            |
| 12658        | 11333      | 7             | R          | 441                | <i>TZ05_2026c</i> | Internalin-like protein         |
| 13007        | 14509      | 7             | F          | 500                | <i>TZ05_2027</i>  | Hypothetical Protein            |
| 15691        | 14891      | 7             | R          | 266                | <i>TZ05_2028c</i> | Hypothetical Protein            |
| 272943       | 273152     | 7             | F          | 69                 | <i>TZ05_2275</i>  | Hypothetical Protein            |
| 273254       | 273658     | 7             | F          | 134                | <i>TZ05_2276</i>  | Hypothetical Protein            |
| 273660       | 274088     | 7             | F          | 142                | <i>TZ05_2277</i>  | Hypothetical Protein            |
| 274857       | 275645     | 7             | F          | 262                | <i>TZ05_2279</i>  | Phage Protein                   |
| 276812       | 276531     | 7             | R          | 93                 | <i>TZ05_2281c</i> | Phage Holin                     |
| 277190       | 276825     | 7             | R          | 121                | <i>TZ05_2282c</i> | Hypothetical Protein            |
| 280972       | 279404     | 7             | R          | 522                | <i>TZ05_2284c</i> | Phage-related protein           |
| 285768       | 280969     | 7             | R          | 1599               | <i>TZ05_2285c</i> | Phage Tail Tape Measure Protein |
| 285949       | 285773     | 7             | R          | 58                 | <i>TZ05_2286c</i> | Hypothetical Protein            |
| 286512       | 286081     | 7             | R          | 143                | <i>TZ05_2287c</i> | Hypothetical Protein            |
| 287254       | 286568     | 7             | R          | 228                | <i>TZ05_2288c</i> | Hypothetical Protein            |
| 287630       | 287259     | 7             | R          | 123                | <i>TZ05_2289c</i> | Hypothetical Protein            |
| 287944       | 287627     | 7             | R          | 105                | <i>TZ05_2290c</i> | Hypothetical Protein            |
| 288299       | 287934     | 7             | R          | 121                | <i>TZ05_2291c</i> | Hypothetical Protein            |
| 288652       | 288299     | 7             | R          | 117                | <i>TZ05_2292c</i> | Hypothetical Protein            |
| 288820       | 288653     | 7             | R          | 55                 | <i>TZ05_2293c</i> | Phage Protein                   |
| 289706       | 288834     | 7             | R          | 290                | <i>TZ05_2294c</i> | Hypothetical Protein            |
| 290283       | 289729     | 7             | R          | 184                | <i>TZ05_2295c</i> | Phage Capsid / Scaffold Protein |
| 291422       | 290379     | 7             | R          | 347                | <i>TZ05_2296c</i> | Hypothetical Protein            |
| 292983       | 291427     | 7             | R          | 518                | <i>TZ05_2297c</i> | Hypothetical Protein            |
| 294158       | 292998     | 7             | R          | 386                | <i>TZ05_2298c</i> | Phage Terminase                 |
| 295041       | 294256     | 7             | R          | 261                | <i>TZ05_2299c</i> | Phage Terminase Small subunit   |

| <b>Start</b> | <b>End</b> | <b>Contig</b> | <b>F/R</b> | <b>Length (AA)</b> | <b>Locus Tag</b>  | <b>Function</b>                                                      |
|--------------|------------|---------------|------------|--------------------|-------------------|----------------------------------------------------------------------|
| 295308       | 295081     | 7             | R          | 75                 | <i>TZ05_2300c</i> | Hypothetical Protein                                                 |
| 296021       | 295389     | 7             | R          | 210                | <i>TZ05_2301c</i> | Phage Protein                                                        |
| 296008       | 296157     | 7             | R          | 49                 | <i>TZ05_2302c</i> | Phage Protein                                                        |
| 296637       | 296203     | 7             | R          | 144                | <i>TZ05_2303c</i> | Hypothetical Protein                                                 |
| 296789       | 296664     | 7             | R          | 41                 | <i>TZ05_2304c</i> | Phage Protein                                                        |
| 297186       | 296782     | 7             | R          | 134                | <i>TZ05_2305c</i> | endodeoxyribonuclease                                                |
| 297292       | 297152     | 7             | R          | 46                 | <i>TZ05_2306c</i> | Hypothetical Protein                                                 |
| 297594       | 297289     | 7             | R          | 101                | <i>TZ05_2307c</i> | Phage Protein                                                        |
| 298506       | 298105     | 7             | R          | 133                | <i>TZ05_2309c</i> | Hypothetical Protein                                                 |
| 298862       | 298503     | 7             | R          | 119                | <i>TZ05_2310c</i> | Hypothetical Protein                                                 |
| 299114       | 298884     | 7             | R          | 76                 | <i>TZ05_2311c</i> | RNA-binding protein                                                  |
| 299238       | 299080     | 7             | R          | 52                 | <i>TZ05_2312c</i> | Hypothetical Protein                                                 |
| 299780       | 299250     | 7             | R          | 176                | <i>TZ05_2313c</i> | Sugar-phosphate nucleotidyltransferase                               |
| 300064       | 299777     | 7             | R          | 95                 | <i>TZ05_2314c</i> | Hypothetical Protein                                                 |
| 301044       | 300061     | 7             | R          | 327                | <i>TZ05_2315c</i> | Hypothetical Protein                                                 |
| 301720       | 301061     | 7             | R          | 219                | <i>TZ05_2316c</i> | Putative recombination protein / Single-stranded DNA-binding protein |
| 302393       | 302199     | 7             | R          | 64                 | <i>TZ05_2318c</i> | Hypothetical Protein                                                 |
| 302617       | 302489     | 7             | R          | 42                 | <i>TZ05_2319c</i> | Phage Protein                                                        |
| 302887       | 302699     | 7             | R          | 62                 | <i>TZ05_2320c</i> | Hypothetical Protein                                                 |
| 303211       | 302996     | 7             | R          | 71                 | <i>TZ05_2321c</i> | Phage Protein                                                        |
| 303741       | 303208     | 7             | R          | 177                | <i>TZ05_2322c</i> | Phage Protein                                                        |
| 304641       | 303865     | 7             | R          | 258                | <i>TZ05_2323c</i> | Phage antirepressor protein / Antirepressor                          |
| 304705       | 304902     | 7             | F          | 65                 | <i>TZ05_2324</i>  | Adenylate kinase                                                     |
| 305185       | 304904     | 7             | R          | 93                 | <i>TZ05_2325c</i> | Hypothetical Protein                                                 |
| 305418       | 305182     | 7             | R          | 78                 | <i>TZ05_2326c</i> | Hypothetical Protein                                                 |
| 305483       | 305842     | 7             | F          | 119                | <i>TZ05_2327</i>  | Hypothetical Protein                                                 |
| 305995       | 305801     | 7             | R          | 64                 | <i>TZ05_2328c</i> | Hypothetical Protein                                                 |
| 306250       | 305999     | 7             | R          | 83                 | <i>TZ05_2329c</i> | DNA-binding protein                                                  |

| <b>Start</b> | <b>End</b> | <b>Contig</b> | <b>F/R</b> | <b>Length (AA)</b> | <b>Locus Tag</b>  | <b>Function</b>                      |
|--------------|------------|---------------|------------|--------------------|-------------------|--------------------------------------|
| 306413       | 306718     | 7             | F          | 101                | <i>TZ05_2330</i>  | XRE family transcriptional regulator |
| 306749       | 307240     | 7             | F          | 163                | <i>TZ05_2331</i>  | Hypothetical Protein                 |
| 307267       | 307974     | 7             | F          | 235                | <i>TZ05_2332</i>  | Hypothetical Protein                 |
| 308033       | 308467     | 7             | F          | 144                | <i>TZ05_2333</i>  | Hypothetical Protein                 |
| 308672       | 310186     | 7             | F          | 504                | <i>TZ05_2334</i>  | ATP-dependent DNA helicase RecG      |
| 310247       | 311605     | 7             | F          | 452                | <i>TZ05_2335</i>  | Integrase                            |
| 39996        | 38089      | 8             | R          | 635                | <i>TZ05_2412c</i> | Hypothetical Protein                 |
| 41923        | 40007      | 8             | R          | 638                | <i>TZ05_2413c</i> | Hypothetical Protein                 |
| 47631        | 47149      | 9             | R          | 160                | <i>TZ05_2660c</i> | Hypothetical Protein                 |
| 48272        | 47628      | 9             | R          | 214                | <i>TZ05_2661c</i> | ABC transporter, ATP-binding protein |
| 49033        | 48284      | 9             | R          | 249                | <i>TZ05_2662c</i> | Membrane Protein                     |
| 49733        | 49035      | 9             | R          | 232                | <i>TZ05_2663c</i> | Membrane Protein                     |
| 50505        | 49720      | 9             | R          | 261                | <i>TZ05_2664c</i> | Conserved membrane-spanning protein  |
| 50978        | 50571      | 9             | R          | 135                | <i>TZ05_2665c</i> | Hypothetical Protein                 |
