# Supplementary material for: Comparative Genomic Analysis of Two Serotype 1/2b Listeria monocytogenes Isolates from Analogous Environmental Niches Demonstrates the Influence of Hypervariable Hotspots in Defining Pathogenesis
Source: PubMed Central journal article supplement (PMC5174086; doi:10.3389/fnut.2016.00054), 2016-12-21
Supplement: table_3.pdf [file table_3.pdf]

**Table S3:** Strain-specific genes in *L. monocytogenes* strain FSL J2-064 when compared to strain DPC6895.

| Start  | End    | Contig | F/R | Length (AA) | Locus Tag         | Function                                                                               |
|--------|--------|--------|-----|-------------|-------------------|----------------------------------------------------------------------------------------|
| 40924  | 40610  | 1      | R   | 104         | <i>M637_00225</i> | Hypothetical Protein                                                                   |
| 317694 | 317584 | 1      | R   | 36          | <i>M637_01675</i> | Hypothetical Protein                                                                   |
| 318242 | 317709 | 1      | R   | 177         | <i>M637_10680</i> | MFS transporter                                                                        |
| 459633 | 458926 | 1      | R   | 235         | <i>M637_02355</i> | Hypothetical Protein                                                                   |
| 584780 | 585394 | 1      | F   | 204         | <i>M637_02955</i> | Hypothetical Protein                                                                   |
| 585704 | 586057 | 1      | F   | 117         | <i>M637_02960</i> | Hypothetical Protein                                                                   |
| 586633 | 586740 | 1      | F   | 35          | <i>M637_02970</i> | Hypothetical Protein                                                                   |
| 592353 | 592715 | 1      | F   | 120         | <i>M637_03005</i> | Hypothetical Protein                                                                   |
| 593188 | 593532 | 1      | F   | 114         | <i>M637_03010</i> | Hypothetical Protein                                                                   |
| 650746 | 650988 | 1      | F   | 80          | <i>M637_03310</i> | Hypothetical Protein                                                                   |
| 651009 | 651452 | 1      | F   | 147         | <i>M637_03315</i> | Hypothetical Protein                                                                   |
| 651684 | 651920 | 1      | F   | 78          | <i>M637_03320</i> | Hypothetical Protein (ADP-ribosyl cyclase / cyclic ADP-ribose hydrolase / CD38 domain) |
| 651926 | 652159 | 1      | F   | 77          | <i>M637_03325</i> | Hypothetical Protein (Immunity protein 45 domain)                                      |
| 652247 | 652594 | 1      | F   | 115         | <i>M637_03330</i> | Hypothetical Protein (dihydroorotate dehydrogenase (quinone))                          |
| 900391 | 899657 | 1      | R   | 244         | <i>M637_04450</i> | Preprotein translocase subunit TatC                                                    |
| 900567 | 900388 | 1      | R   | 59          | <i>M637_04455</i> | Preprotein translocase subunit TatA                                                    |
| 902444 | 903928 | 1      | F   | 494         | <i>M637_04470</i> | FTR1 family iron permease                                                              |
| 903925 | 905085 | 1      | F   | 386         | <i>M637_04475</i> | Hypothetical Protein (Iron transport domain)                                           |
| 905103 | 906368 | 1      | F   | 421         | <i>M637_04480</i> | Deferochelatase                                                                        |
| 913938 | 914078 | 1      | F   | 46          | <i>M637_04535</i> | Hypothetical Protein                                                                   |
| 914117 | 914563 | 1      | F   | 148         | <i>M637_04540</i> | Hypothetical Protein                                                                   |
| 914655 | 914906 | 1      | F   | 83          | <i>M637_04545</i> | Hypothetical Protein                                                                   |
| 915000 | 915284 | 1      | F   | 94          | <i>M637_04550</i> | Hypothetical Protein                                                                   |
| 915521 | 915907 | 1      | F   | 128         | <i>M637_04555</i> | Hypothetical Protein                                                                   |
| 981302 | 984082 | 1      | F   | 926         | <i>M637_04910</i> | Membrane / Phage Infection Protein                                                     |

| <b>Start</b> | <b>End</b> | <b>Contig</b> | <b>F/R</b> | <b>Length (AA)</b> | <b>Locus Tag</b>  | <b>Function</b>                              |
|--------------|------------|---------------|------------|--------------------|-------------------|----------------------------------------------|
| 984326       | 985813     | 1             | F          | 495                | <i>M637_04915</i> | Transcriptional Regulator                    |
| 986087       | 987076     | 1             | F          | 329                | <i>M637_04920</i> | Hypothetical Protein                         |
| 990079       | 990234     | 1             | F          | 51                 | <i>M637_04935</i> | Hypothetical Protein                         |
| 1003561      | 1005099    | 1             | F          | 512                | <i>M637_04990</i> | Transcriptional Regulator                    |
| 1005363      | 1007444    | 1             | F          | 693                | <i>M637_04995</i> | Type IV internalin                           |
| 1007580      | 1009649    | 1             | F          | 689                | <i>M637_05000</i> | Type IV internalin                           |
| 1009785      | 1010012    | 1             | F          | 75                 | <i>M637_05005</i> | Hypothetical Protein                         |
| 1010109      | 1011542    | 1             | F          | 477                | <i>M637_05010</i> | Type IV internalin                           |
| 1011608      | 1012081    | 1             | F          | 157                | <i>M637_05015</i> | Hypothetical Protein                         |
| 1012101      | 1012586    | 1             | F          | 161                | <i>M637_05020</i> | Hypothetical Protein                         |
| 1012614      | 1012919    | 1             | F          | 101                | <i>M637_05025</i> | <i>lmo0463</i> homolog                       |
| 1019364      | 1021127    | 1             | F          | 587                | <i>M637_05070</i> | Reverse Transcriptase                        |
| 1060772      | 1061959    | 1             | F          | 395                | <i>M637_05265</i> | Hypothetical Protein                         |
| 1062044      | 1062973    | 1             | F          | 309                | <i>M637_05270</i> | Integrase                                    |
| 1064230      | 1063013    | 1             | R          | 405                | <i>M637_05275</i> | Type I restriction endonuclease subunit S    |
| 1147280      | 1145916    | 1             | R          | 454                | <i>M637_05655</i> | Cell Wall Anchor Protein                     |
| 1349581      | 1350012    | 1             | F          | 143                | <i>M637_06730</i> | Hypothetical Protein                         |
| 1350090      | 1350362    | 1             | F          | 90                 | <i>M637_06735</i> | Hypothetical Protein                         |
| 1633335      | 1635710    | 1             | F          | 791                | <i>M637_08155</i> | ATP-dependent DNA helicase PcrA              |
| 1635733      | 1637316    | 1             | F          | 527                | <i>M637_08160</i> | Hypothetical Protein                         |
| 1637301      | 1638419    | 1             | F          | 372                | <i>M637_08165</i> | Hypothetical Protein (UvrD domain)           |
| 1638443      | 1639534    | 1             | F          | 363                | <i>M637_08170</i> | Hypothetical Protein                         |
| 1640028      | 1640843    | 1             | F          | 271                | <i>M637_08175</i> | Nucleotidyltransferase                       |
| 1640864      | 1641421    | 1             | F          | 185                | <i>M637_08180</i> | Hypothetical Protein                         |
| 1641849      | 1641568    | 1             | R          | 93                 | <i>M637_08185</i> | Transcriptional Regulator                    |
| 1642748      | 1644145    | 1             | F          | 465                | <i>M637_08200</i> | Hypothetical Protein (LXG domain containing) |
| 1646345      | 1646848    | 1             | F          | 167                | <i>M637_08225</i> | Hypothetical Protein                         |
| 1646962      | 1647264    | 1             | F          | 100                | <i>M637_08230</i> | Hypothetical Protein                         |

| <b>Start</b> | <b>End</b> | <b>Contig</b> | <b>F/R</b> | <b>Length (AA)</b> | <b>Locus Tag</b>  | <b>Function</b>                                    |
|--------------|------------|---------------|------------|--------------------|-------------------|----------------------------------------------------|
| 1647407      | 1647937    | 1             | F          | 176                | <i>M637_08235</i> | Hypothetical Protein (Protein WWC2)                |
| 1755467      | 1754313    | 1             | R          | 384                | <i>M637_08830</i> | Integrase                                          |
| 1756174      | 1755602    | 1             | R          | 190                | <i>M637_08835</i> | Hypothetical Protein                               |
| 1756677      | 1756225    | 1             | R          | 150                | <i>M637_08840</i> | Toxin                                              |
| 1757017      | 1756694    | 1             | R          | 107                | <i>M637_08845</i> | XRE family transcriptional regulator               |
| 1757301      | 1757477    | 1             | F          | 58                 | <i>M637_08850</i> | Hypothetical Protein                               |
| 1757464      | 1757616    | 1             | F          | 50                 | <i>M637_08855</i> | Hypothetical Protein                               |
| 1757928      | 1757635    | 1             | R          | 97                 | <i>M637_08860</i> | Hypothetical Protein                               |
| 1757998      | 1758321    | 1             | F          | 107                | <i>M637_08865</i> | Hypothetical Protein                               |
| 1758336      | 1758539    | 1             | F          | 67                 | <i>M637_08870</i> | XRE family transcriptional regulator               |
| 1758541      | 1758783    | 1             | F          | 80                 | <i>M637_08875</i> | Hypothetical Protein                               |
| 1758786      | 1758971    | 1             | F          | 61                 | <i>M637_08880</i> | Hypothetical Protein                               |
| 1759074      | 1759196    | 1             | F          | 40                 | <i>M637_08885</i> | Hypothetical Protein                               |
| 1759206      | 1759358    | 1             | F          | 50                 | <i>M637_08890</i> | Hypothetical Protein                               |
| 1759495      | 1760208    | 1             | F          | 237                | <i>M637_08895</i> | Hypothetical Protein                               |
| 1760219      | 1761163    | 1             | F          | 314                | <i>M637_08900</i> | Integrase                                          |
| 1761176      | 1761856    | 1             | F          | 226                | <i>M637_08905</i> | Hypothetical Protein (Myb-like DNA-binding domain) |
| 1761853      | 1762422    | 1             | F          | 189                | <i>M637_08910</i> | Phage Related Protein                              |
| 1762419      | 1762943    | 1             | F          | 174                | <i>M637_08915</i> | Hypothetical Protein                               |
| 1762940      | 1763530    | 1             | F          | 196                | <i>M637_08920</i> | Hypothetical Protein                               |
| 1763530      | 1763733    | 1             | F          | 67                 | <i>M637_08925</i> | Hypothetical Protein                               |
| 1763734      | 1763934    | 1             | F          | 66                 | <i>M637_08930</i> | Hypothetical Protein                               |
| 1763931      | 1764431    | 1             | F          | 166                | <i>M637_08935</i> | Hypothetical Protein                               |
| 1765037      | 1764477    | 1             | R          | 186                | <i>M637_08940</i> | Hypothetical Protein                               |
| 1765142      | 1765315    | 1             | F          | 57                 | <i>M637_08945</i> | Hypothetical Protein                               |
| 1765312      | 1765695    | 1             | F          | 127                | <i>M637_08950</i> | Hypothetical Protein                               |
| 1766195      | 1766887    | 1             | F          | 230                | <i>M637_08960</i> | DNA-binding Protein                                |
| 1766951      | 1768207    | 1             | F          | 418                | <i>M637_08965</i> | Helicase                                           |

| <b>Start</b> | <b>End</b> | <b>Contig</b> | <b>F/R</b> | <b>Length (AA)</b> | <b>Locus Tag</b>  | <b>Function</b>                 |
|--------------|------------|---------------|------------|--------------------|-------------------|---------------------------------|
| 1768232      | 1768717    | 1             | F          | 161                | <i>M637_08970</i> | Hypothetical Protein            |
| 1768740      | 1771082    | 1             | F          | 780                | <i>M637_08975</i> | DNA Primase                     |
| 1771378      | 1771698    | 1             | F          | 106                | <i>M637_08980</i> | Hypothetical Protein            |
| 1771695      | 1771964    | 1             | F          | 89                 | <i>M637_08985</i> | Hypothetical Protein            |
| 1771967      | 1772605    | 1             | F          | 212                | <i>M637_08990</i> | Hypothetical Protein            |
| 1772606      | 1773031    | 1             | F          | 141                | <i>M637_08995</i> | Hypothetical Protein            |
| 1773261      | 1774160    | 1             | F          | 299                | <i>M637_09000</i> | Hypothetical Protein            |
| 1774421      | 1774747    | 1             | F          | 108                | <i>M637_09005</i> | Hypothetical Protein            |
| 1774747      | 1775061    | 1             | F          | 104                | <i>M637_09010</i> | alpha/beta hydrolase            |
| 1775167      | 1775466    | 1             | F          | 99                 | <i>M637_09015</i> | Hypothetical Protein            |
| 1775463      | 1777106    | 1             | F          | 547                | <i>M637_09020</i> | Terminase                       |
| 1777505      | 1777116    | 1             | R          | 129                | <i>M637_09025</i> | Hypothetical Protein            |
| 1777556      | 1778686    | 1             | F          | 376                | <i>M637_09030</i> | Portal Protein                  |
| 1778683      | 1779399    | 1             | F          | 238                | <i>M637_09035</i> | Peptidase                       |
| 1779426      | 1780577    | 1             | F          | 383                | <i>M637_09040</i> | Phage Capsid Protein            |
| 1780584      | 1780754    | 1             | F          | 56                 | <i>M637_09045</i> | Hypothetical Protein            |
| 1780764      | 1781063    | 1             | F          | 99                 | <i>M637_09050</i> | Hypothetical Protein            |
| 1781047      | 1781412    | 1             | F          | 121                | <i>M637_09055</i> | Phage head-tail adapter Protein |
| 1781409      | 1781810    | 1             | F          | 133                | <i>M637_09060</i> | Hypothetical Protein            |
| 1781807      | 1782190    | 1             | F          | 127                | <i>M637_09065</i> | Hypothetical Protein            |
| 1782211      | 1782798    | 1             | F          | 195                | <i>M637_09070</i> | Phage tail protein              |
| 1782869      | 1783201    | 1             | F          | 110                | <i>M637_09075</i> | Hypothetical Protein            |
| 1783252      | 1783413    | 1             | F          | 53                 | <i>M637_09080</i> | Hypothetical Protein            |
| 1783417      | 1788336    | 1             | F          | 1639               | <i>M637_09085</i> | Phage Tail Tape Measure Protein |
| 1788329      | 1789978    | 1             | F          | 549                | <i>M637_09090</i> | Phage Tail Protein              |
| 1789991      | 1792285    | 1             | F          | 764                | <i>M637_09095</i> | Hypothetical Protein            |
| 1793419      | 1793862    | 1             | F          | 147                | <i>M637_09105</i> | Hypothetical Protein            |
| 1793841      | 1794257    | 1             | F          | 138                | <i>M637_09110</i> | Hypothetical Protein            |

| <b>Start</b> | <b>End</b> | <b>Contig</b> | <b>F/R</b> | <b>Length (AA)</b> | <b>Locus Tag</b>  | <b>Function</b>           |
|--------------|------------|---------------|------------|--------------------|-------------------|---------------------------|
| 1794278      | 1794544    | 1             | F          | 88                 | <i>M637_09115</i> | Phage Holin               |
| 1796444      | 1795995    | 1             | R          | 149                | <i>M637_09130</i> | Hypothetical Protein      |
| 1796821      | 1796450    | 1             | R          | 123                | <i>M637_09135</i> | Hypothetical Protein      |
| 1797083      | 1796850    | 1             | R          | 77                 | <i>M637_09140</i> | Hypothetical Protein      |
| 1797617      | 1797778    | 1             | F          | 53                 | <i>M637_09150</i> | Hypothetical Protein      |
| 2641107      | 2640802    | 1             | R          | 101                | <i>M637_13220</i> | <i>lmo0463</i> homolog    |
| 2641620      | 2641135    | 1             | R          | 161                | <i>M637_13225</i> | Hypothetical Protein      |
| 2642113      | 2641640    | 1             | R          | 157                | <i>M637_13230</i> | Hypothetical Protein      |
| 2644248      | 2642179    | 1             | R          | 689                | <i>M637_13235</i> | Type IV internalin        |
| 2646452      | 2644383    | 1             | R          | 689                | <i>M637_13240</i> | Type IV internalin        |
| 2648232      | 2646694    | 1             | R          | 512                | <i>M637_13245</i> | Transcriptional Regulator |
| 2650242      | 2650397    | 1             | F          | 51                 | <i>M637_13260</i> | Hypothetical Protein      |
