# Supplementary material for: Comparative Genomic Analysis of Two Serotype 1/2b Listeria monocytogenes Isolates from Analogous Environmental Niches Demonstrates the Influence of Hypervariable Hotspots in Defining Pathogenesis
Source: PubMed Central journal article supplement (PMC5174086; doi:10.3389/fnut.2016.00054), 2016-12-21
Supplement: table_4.pdf [file table_4.pdf]

**Table S4:** Antibiotic / Heavy Metal resistance genes in each input *L. monocytogenes* strain

| Function                                                                  | DPC6895 locus tag                                                                                                                   | FSL J2-064 locus tag                                                                                                                |
|---------------------------------------------------------------------------|-------------------------------------------------------------------------------------------------------------------------------------|-------------------------------------------------------------------------------------------------------------------------------------|
|                                                                           | Prefix: TZ05_                                                                                                                       | Prefix: M637_                                                                                                                       |
| <b>Multi-drug Resistance</b>                                              | 0003, 0116c, 0117c, 0615c, 0617, 0681, 0752, 0836, 0984c, 0993, 1607, 1639, 1640, 2072, <b>2661c</b> , 2741, 2744, 2764, 2771, 2797 | 01905, 01920, 02025, 02060, 02190, 02590, 03140, 03145, 05700, 05710, 06035, 06395, 06830, 07585, 07630, 11065, 11230, 11235, 13485 |
| <b>Benzalkonium Chloride resistance <i>mdrL</i></b>                       | 1398                                                                                                                                | 10025                                                                                                                               |
| <b>Benzalkonium Chloride resistance <i>lde</i></b>                        | 2760c                                                                                                                               | 2005                                                                                                                                |
| <b>Bacteriocin Transport &amp; Multi Antimicrobial extrusion</b>          | 1842, 1898c, 2086c                                                                                                                  | 12340, 12620, 13560                                                                                                                 |
| <b>Tellurite Resistance</b>                                               | 1962                                                                                                                                | 12945                                                                                                                               |
| <b>Camphor Resistance</b>                                                 | 2080c, 2081c                                                                                                                        | 13525, 13530                                                                                                                        |
| <b>Bacitracin Transport</b>                                               | 0031c, 1626, 1744c, 2114                                                                                                            | 02730, 11160, 11845, 13700                                                                                                          |
| <b>QAC Resistance</b>                                                     | 0852, 0853                                                                                                                          | 06910, 06915                                                                                                                        |
| <b><math>\beta</math>-lactamase &amp; Metallo-beta-lactamase proteins</b> | 0298, 0946, 1423c, 1567c, 1604c, 1787, 2157c, 2167c                                                                                 | 04090, 07400, 10150, 10870, 11050, 12070, 13940, 13990                                                                              |
| <b>Quinolone Resistance</b>                                               | 1240, 2836                                                                                                                          | 02380, 09215                                                                                                                        |
| <b>Fosfomycin Resistance</b>                                              | 1701c                                                                                                                               | 11630                                                                                                                               |
| <b>Vancomycin Resistance</b>                                              | 1643, 1695                                                                                                                          | 11260, 11600                                                                                                                        |
| <b>Aminoglycoside N3-acetyltransferase</b>                                | 1707                                                                                                                                | 11660                                                                                                                               |
| <b>Lincomycin Resistance</b>                                              | 0528, 2596c                                                                                                                         | 05245, 01145                                                                                                                        |
| <b>Tetracycline Resistance</b>                                            | 0838c                                                                                                                               | 6840                                                                                                                                |
| <b>Heavy Metal Transport</b>                                              | 1848c, 2061, 1435c                                                                                                                  | 13430, 12370, 10210                                                                                                                 |
| <b>Aluminium Resistance</b>                                               | 1287                                                                                                                                | 9465                                                                                                                                |
| <b>Lead / Cadmium / Zinc Resistance</b>                                   | <b>0420c, 0421</b> , 0652, 1849c, 2233, 2426c, 2582c                                                                                | 05890, 12375, 14315, 00290, 01080                                                                                                   |
