# Supplementary material for: Comparative Genomic Analysis of Two Serotype 1/2b Listeria monocytogenes Isolates from Analogous Environmental Niches Demonstrates the Influence of Hypervariable Hotspots in Defining Pathogenesis
Source: PubMed Central journal article supplement (PMC5174086; doi:10.3389/fnut.2016.00054), 2016-12-21
Supplement: table_5.pdf [file table_5.pdf]

**Table S5:** *L. monocytogenes* strain DPC6895 Cadmium Resistance Islet

| Start  | End    | Contig | Length<br>(Amino Acids) | Locus Tag         | Function                                                                        |
|--------|--------|--------|-------------------------|-------------------|---------------------------------------------------------------------------------|
| 198138 | 196027 | 2      | 703                     | <i>TZ05_0420c</i> | Lead/cadmium/zinc and mercury transporting ATPase                               |
| 198499 | 198131 | 2      | 122                     | <i>TZ05_0421c</i> | Cadmium efflux system accessory protein / ArsR family transcriptional regulator |
| 199129 | 198536 | 2      | 197                     | <i>TZ05_0422c</i> | SAM-dependent methyltransferase                                                 |
| 199636 | 200190 | 2      | 187                     | <i>TZ05_0423</i>  | Resolvase/Integrase Bin                                                         |
| 200204 | 201658 | 2      | 484                     | <i>TZ05_0424</i>  | Tn552 transposase                                                               |
| 201651 | 202463 | 2      | 270                     | <i>TZ05_0425</i>  | ATP-binding protein p271                                                        |
