# Supplementary material for: Comparative Genomic Analysis of Two Serotype 1/2b Listeria monocytogenes Isolates from Analogous Environmental Niches Demonstrates the Influence of Hypervariable Hotspots in Defining Pathogenesis
Source: PubMed Central journal article supplement (PMC5174086; doi:10.3389/fnut.2016.00054), 2016-12-21
Supplement: table_6.pdf [file table_6.pdf]

**Table S6:** A list of internalin genes present in each of the *L. monocytogenes* input strains.

| Internalin Family                   | Gene Name     | EGDe homolog   | DPC6895 locus tag | FSL J2-064 locus tag |
|-------------------------------------|---------------|----------------|-------------------|----------------------|
| Type I<br>LPXGT-<br>internalins     | <i>inA</i>    | <i>lmo0433</i> | TZ05_0450         | M637_04850           |
|                                     | <i>inC2/H</i> | <i>lmo0263</i> | TZ05_0268         | M637_03935           |
|                                     | <i>inD</i>    | -              | TZ05_0269         | M637_03940           |
|                                     | <i>inE</i>    | <i>lmo0264</i> | TZ05_0270         | M637_03945           |
|                                     | <i>inF</i>    | <i>lmo0409</i> | TZ05_0429         | M637_04750           |
|                                     | <i>inI</i>    | <i>lmo0333</i> | TZ05_0340         | M637_04290           |
|                                     | <i>inJ</i>    | <i>lmo2821</i> | TZ05_2839         | M637_02395           |
|                                     | <i>inK</i>    | <i>lmo1290</i> | TZ05_1280         | M637_09430           |
|                                     |               | <i>lmo0327</i> | TZ05_0336         | M637_04270           |
|                                     |               | <i>lmo0331</i> | TZ05_0338c        | M637_04280           |
|                                     |               | <i>lmo0514</i> | TZ05_0516         | M637_05220           |
|                                     |               | <i>lmo0610</i> | TZ05_0620c        | M637_05725           |
|                                     |               | <i>lmo0732</i> | TZ05_0746         | M637_06365           |
|                                     |               | <i>lmo1136</i> | TZ05_1121         | M637_08305           |
|                                     |               | <i>lmo2026</i> | TZ05_0790         | M637_06585           |
|                                     |               | <i>lmo2396</i> | TZ05_2401         | M637_00170           |
|                                     |               | -              | TZ05_0339         | M637_04285           |
|                                     |               | -              | TZ05_0364         | M637_04410           |
|                                     |               | -              | TZ05_1230         | M637_09165           |
|                                     |               | -              | TZ05_2026c        | -                    |
|                                     | -             | TZ05_2672      | M637_01530        |                      |
| Type II GW-<br>/WxL-<br>internalins | <i>inB</i>    | <i>lmo0434</i> | TZ05_0451         | M637_04855           |
|                                     |               | <i>lmo0549</i> | TZ05_0559         | M637_05415           |

| <b>Internalin Family</b>            | <b>Gene Name</b> | <b>EGDe homolog</b> | <b>DPC6895 locus tag</b> | <b>FSL J2-064 locus tag</b> |
|-------------------------------------|------------------|---------------------|--------------------------|-----------------------------|
| Type III<br>Secreted<br>internalins | <i>inlC</i>      | <i>lmo1786</i>      | TZ05_1783c               | M637_12050                  |
|                                     |                  | <i>lmo2445</i>      | TZ05_2449c               | M637_00405                  |
|                                     |                  | <i>lmo2470</i>      | TZ05_2474                | M637_00545                  |
|                                     |                  | <i>lmo0460</i>      | -                        | M637_04995                  |
|                                     |                  | <i>lmo0460</i>      | -                        | M637_05000                  |
|                                     |                  | <i>lmo0460</i>      | -                        | M637_05010                  |
| Type IV<br>internalins              |                  | <i>lmo0460</i>      | -                        | M637_13235                  |
|                                     |                  | <i>lmo0460</i>      | -                        | M637_13240                  |
|                                     |                  | <i>lmo0460</i>      | -                        |                             |
|                                     |                  | <i>lmo0460</i>      | -                        |                             |
| Internalin-<br>like proteins        |                  | <i>lmo0463</i>      | -                        | M637_05025                  |
|                                     |                  | <i>lmo0463</i>      | -                        | M637_13220                  |
|                                     |                  | -                   | TZ05_0276c               | M637_03975                  |
|                                     |                  | -                   | TZ05_2447c               | M637_00395                  |
